# Supplementary material for: MIRU-profiler: a rapid tool for determination of 24-loci MIRU-VNTR profiles from assembled genomes of Mycobacterium tuberculosis
Source: PeerJ. 2018 Jul 11;6:e5090. doi: 10.7717/peerj.5090 (PMC6045920; doi:10.7717/peerj.5090)
Supplement: Table S1 [file peerj-06-5090-s001.xlsx]

## Sheet: Table S1
Table S1: Results for the MIRU-profiler evaluation on the draft genomes based on 150bp reads.
ENA Accession	Number of Contigs	Average depth	Average sequence quality	Lineage	MLVA 15-19	Experimental results	MIRU-profiler	Discrepent loci (MM=Mismatch, ND=NOT_DETECTED, UAN=UNKNOWN_ALLELE_NUM)	Number of mismatches	Number of undetected loci	Number of unknown_allele_number flags
ERR1952138	205	263.945	37	4	67-25	2-2-3-2-6-3-3-4-2-3-3-4-4-2-5-1-4-3-2-3-3-6-1-3	2-2-3-2-UAN-3-3-3-2-2-3-3-UAN-2-5-1-3-3-2-3-3-UAN-1-3	UAN:MIRU40;MM:Mtub21;MM:QUB11b;MM:Mtub29;UAN:Mtub30;MM:MIRU26;UAN:QUB26;	4	0	3
ERR1952140	194	217.847	37	1	1740-44	2-1-5-8-3-4-3-7-2-9-4-3-2-6-6-2-2-3-3-4-2-7-1-3	2-1-UAN-UAN-3-3-3-4-2-ND-4-3-2-3-6-2-2-ND-3-3-2-ND-1-ND	UAN:ETRC;UAN:MIRU04;MM:MIRU10;MM:Mtub21;ND:QUB11b;MM:ETRB;ND:MIRU27;MM:MIRU31;ND:QUB26;ND:MIRU39	4	4	2
ERR1952141	206	224.74	37	2	100-32	2-4-4-2-3-3-3-5-2-6-4-4-4-2-5-1-7-3-3-5-3-7-2-3	2-3-ND-2-3-3-3-UAN-2-3-3-3-2-2-5-1-ND-3-3-3-3-ND-2-3	MM:Mtub04;ND:ETRC;UAN:Mtub21;MM:QUB11b;MM:ETRA;MM:Mtub29;MM:Mtub30;ND:MIRU26;MM:MIRU31;ND:QUB26;	6	3	1
ERR1952142	234	134.625	37	1	1741-212	2-2-4-3-3-4-3-8-2-3-6-3-1-4-10-2-2-3-3-7-4-6-1-3	2-2-ND-3-3-3-3-5-2-2-ND-3-1-UAN-ND-2-2-ND-3-UAN-3-2-1-3	ND:ETRC;MM:MIRU10;MM:Mtub21;MM:QUB11b;ND:ETRA;UAN:ETRB;ND:MIRU23;ND:MIRU27;UAN:MIRU31;MM:Mtub39;MM:QUB26;	5	4	2
ERR2120250	205	354.695	35	4	5942-15	2-2-4-2-4-3-3-3-2-4-2-4-2-2-5-1-4-3-3-3-4-3-2-2	2-2-3-2-UAN-3-3-3-2-1-2-3-2-2-5-1-ND-3-3-3-3-UAN-2-2	MM:ETRC;UAN:MIRU40;MM:QUB11b;MM:Mtub29;ND:MIRU26;MM:Mtub39;UAN:QUB26;	4	1	2
ERR2120251	146	174.794	35	4	5942-15	2-2-4-2-4-3-3-3-2-4-2-4-2-2-5-1-4-3-3-3-4-3-2-2	2-2-ND-1-3-3-3-3-2-1-2-UAN-2-2-5-1-3-3-3-3-3-UAN-2-2	ND:ETRC;MM:MIRU04;MM:MIRU40;MM:QUB11b;UAN:Mtub29;MM:MIRU26;MM:Mtub39;UAN:QUB26;	5	1	2
ERR2120252	123	214.362	36	4	5942-15	2-2-4-2-4-3-3-3-2-4-2-4-2-2-5-1-4-3-3-3-4-3-2-2	2-2-3-2-UAN-3-3-3-2-2-2-UAN-2-2-5-1-3-3-3-3-2-UAN-2-2	MM:ETRC;UAN:MIRU40;MM:QUB11b;UAN:Mtub29;MM:MIRU26;MM:Mtub39;UAN:QUB26;	4	0	3
ERR2120253	113	446.261	34	4	5942-15	2-2-4-2-4-3-3-3-2-4-2-4-2-2-5-1-4-3-3-3-4-3-2-2	2-2-3-2-3-3-3-3-2-1-2-3-2-2-5-1-ND-3-3-3-3-2-2-2	MM:ETRC;MM:MIRU40;MM:QUB11b;MM:Mtub29;ND:MIRU26;MM:Mtub39;MM:QUB26;	6	1	0
ERR2120254	147	171.551	36	4	5942-15	2-2-4-2-4-3-3-3-2-4-2-4-2-2-5-1-4-3-3-3-4-3-2-2	2-2-3-2-UAN-3-3-3-2-1-2-3-2-2-5-1-3-3-3-3-3-2-2-2	MM:ETRC;UAN:MIRU40;MM:QUB11b;MM:Mtub29;MM:MIRU26;MM:Mtub39;MM:QUB26;	6	0	1
ERR2120255	290	85.987	34	4	5942-15	2-2-4-2-4-3-3-3-2-4-2-4-2-2-5-1-4-3-3-3-4-3-2-2	2-2-3-1-UAN-3-3-3-2-1-2-ND-2-2-5-1-3-3-3-3-3-UAN-2-2	MM:ETRC;MM:MIRU04;UAN:MIRU40;MM:QUB11b;ND:Mtub29;MM:MIRU26;MM:Mtub39;UAN:QUB26;	5	1	2
ERR2120256	198	352.851	35	4	5942-15	2-2-4-2-4-3-3-3-2-4-2-4-2-2-5-1-4-3-3-3-4-3-2-2	2-2-3-2-3-3-3-3-2-1-2-ND-2-2-5-1-ND-3-3-3-3-ND-2-2	MM:ETRC;MM:MIRU40;MM:QUB11b;ND:Mtub29;ND:MIRU26;MM:Mtub39;ND:QUB26;	4	3	0
ERR2120257	1660	175.937	34	4	5942-15	2-2-4-2-4-3-3-3-2-4-2-4-2-2-5-1-4-3-3-3-4-3-2-2	2-2-UAN-2-3-3-3-3-2-1-2-3-2-2-5-1-3-3-3-3-3-UAN-2-2	UAN:ETRC;MM:MIRU40;MM:QUB11b;MM:Mtub29;MM:MIRU26;MM:Mtub39;UAN:QUB26;	5	0	2
ERR2120258	138	112.215	35	4	5942-15	2-2-4-2-4-3-3-3-2-4-2-4-2-2-5-1-4-3-3-3-4-3-2-2	2-2-ND-2-UAN-3-3-3-2-1-2-3-2-2-5-1-ND-3-3-3-3-2-2-2	ND:ETRC;UAN:MIRU40;MM:QUB11b;MM:Mtub29;ND:MIRU26;MM:Mtub39;MM:QUB26;	4	2	1
ERR2120260	112	83.501	36	4	5942-15	2-2-4-2-4-3-3-3-2-4-2-4-2-2-5-1-4-3-3-3-4-3-2-2	2-2-UAN-2-UAN-3-3-3-2-2-2-3-2-2-5-1-3-3-3-3-UAN-UAN-2-2	UAN:ETRC;UAN:MIRU40;MM:QUB11b;MM:Mtub29;MM:MIRU26;UAN:Mtub39;UAN:QUB26;	3	0	4
ERR2120261	179	571.612	35	4	5942-15	2-2-4-2-4-3-3-3-2-4-2-4-2-2-5-1-4-3-3-3-4-3-2-2	2-2-3-2-3-3-3-3-2-1-2-UAN-2-2-5-1-3-3-3-3-3-2-2-2	MM:ETRC;MM:MIRU40;MM:QUB11b;UAN:Mtub29;MM:MIRU26;MM:Mtub39;MM:QUB26;	6	0	1
ERR2120262	180	106.514	34	4	5942-15	2-2-4-2-4-3-3-3-2-4-2-4-2-2-5-1-4-3-3-3-4-3-2-2	2-2-3-1-UAN-3-3-3-2-1-2-3-2-2-5-1-3-3-3-3-2-1-2-2	MM:ETRC;MM:MIRU04;UAN:MIRU40;MM:QUB11b;MM:Mtub29;MM:MIRU26;MM:Mtub39;MM:QUB26;	7	0	1
ERR2120263	271	233.67	35	4	5942-15	2-2-4-2-4-3-3-3-2-4-2-4-2-2-5-1-4-3-3-3-4-3-2-2	2-2-3-1-UAN-3-3-3-2-1-2-3-2-2-5-1-3-3-3-3-UAN-UAN-2-2	MM:ETRC;MM:MIRU04;UAN:MIRU40;MM:QUB11b;MM:Mtub29;MM:MIRU26;UAN:Mtub39;UAN:QUB26;	5	0	3
ERR2120270	242	51.809	37	4	5942-15	2-2-4-2-4-3-3-3-2-4-2-4-2-2-5-1-4-3-3-3-4-3-2-2	2-2-3-2-UAN-3-3-3-2-ND-2-3-2-2-5-1-ND-3-3-3-3-2-2-2	MM:ETRC;UAN:MIRU40;ND:QUB11b;MM:Mtub29;ND:MIRU26;MM:Mtub39;MM:QUB26;	4	2	1
ERR2120274	183	64.339	37	4	5942-15	2-2-4-2-4-3-3-3-2-4-2-4-2-2-5-1-4-3-3-3-4-3-2-2	2-2-ND-2-3-3-3-3-2-2-2-3-2-2-5-1-3-3-3-3-3-ND-2-2	ND:ETRC;MM:MIRU40;MM:QUB11b;MM:Mtub29;MM:MIRU26;MM:Mtub39;ND:QUB26;	5	2	0
ERR2120275	164	82.643	37	4	5942-15	2-2-4-2-4-3-3-3-2-4-2-4-2-2-5-1-4-3-3-3-4-3-2-2	2-2-3-2-3-3-3-3-2-ND-2-3-2-2-5-1-3-3-3-3-UAN-ND-2-2	MM:ETRC;MM:MIRU40;ND:QUB11b;MM:Mtub29;MM:MIRU26;UAN:Mtub39;ND:QUB26;	4	2	1
ERR2120293	196	37.136	37	4	5942-15	2-2-4-2-4-3-3-3-2-4-2-4-2-2-5-1-4-3-3-3-4-3-2-2	2-2-3-1-UAN-3-3-3-2-3-2-3-2-2-5-1-ND-2-ND-3-3-1-2-2	MM:ETRC;MM:MIRU04;UAN:MIRU40;MM:QUB11b;MM:Mtub29;ND:MIRU26;MM:MIRU27;ND:Mtub34;MM:Mtub39;MM:QUB26;	7	2	1
ERR2120294	246	24.745	37	4	5942-15	2-2-4-2-4-3-3-3-2-4-2-4-2-2-5-1-4-3-3-3-4-3-2-2	2-2-ND-2-2-3-3-3-2-UAN-2-3-2-2-5-1-3-2-3-3-UAN-2-2-2	ND:ETRC;MM:MIRU40;UAN:QUB11b;MM:Mtub29;MM:MIRU26;MM:MIRU27;UAN:Mtub39;MM:QUB26;	5	1	2
